# Supplementary material for: Deep Learning-Based Stroke Volume Estimation Outperforms Conventional Arterial Contour Method in Patients with Hemodynamic Instability
Source: PubMed Central journal article supplement (PMC6780281; doi:10.3390/jcm8091419), 2019-09-09
Supplement: jcm-08-01419-s001.pdf [file jcm-08-01419-s001.pdf]

Supplementary Table

Predicted result based on performance error and root mean square error

|                         | Data Records | MDPE    |          | MDAPE  |          | APE             |                 | P value | RMSE   |          |
|-------------------------|--------------|---------|----------|--------|----------|-----------------|-----------------|---------|--------|----------|
|                         |              | EV1000  | DL model | EV1000 | DL model | EV1000          | DL model        |         | EV1000 | DL model |
| <b>Overall</b>          | 491,353      | 0.0032  | 0.0000   | 0.0966 | 0.0861   | 0.1317 ± 0.1257 | 0.1176 ± 0.1143 | <0.001  | 15.06  | 13.90    |
| <b>Pre-anhepatic</b>    | 211,265      | 0.0032  | -0.0160  | 0.0863 | 0.0802   | 0.1233 ± 0.1251 | 0.1131 ± 0.1162 | <0.001  | 14.17  | 13.39    |
| <b>Anhepatic</b>        | 62,391       | 0.0399  | 0.0161   | 0.0990 | 0.0898   | 0.1401 ± 0.1342 | 0.1292 ± 0.1199 | <0.001  | 12.65  | 11.84    |
| <b>Reperfusion</b>      | 8,841        | -0.0575 | -0.0526  | 0.1497 | 0.0911   | 0.2067 ± 0.2097 | 0.1134 ± 0.0990 | <0.001  | 23.17  | 12.90    |
| <b>Post-reperfusion</b> | 208,856      | -0.0065 | 0.0173   | 0.1054 | 0.0903   | 0.1345 ± 0.1173 | 0.1188 ± 0.1110 | <0.001  | 16.12  | 14.97    |

EV1000 refer to pre-existing stroke volume monitoring device that using arterial blood pressure from arterial catheter. DL, deep-learning; PE, (measured SV-predicted SV) / predicted SV; MDPE (median performance error), median of PE; MDAPE, median of absolute PE; RMSE, root mean square error.
